# Supplementary material for: Comparative sequence analysis elucidates the evolutionary patterns of Yersinia pestis in New Mexico over thirty-two years
Source: PeerJ journal article supplement (doi:10.7717/peerj.16007), 2023-09-26
Supplement: Supplementary_Figure_1.pdf [file Supplementary_Figure_1.pdf]

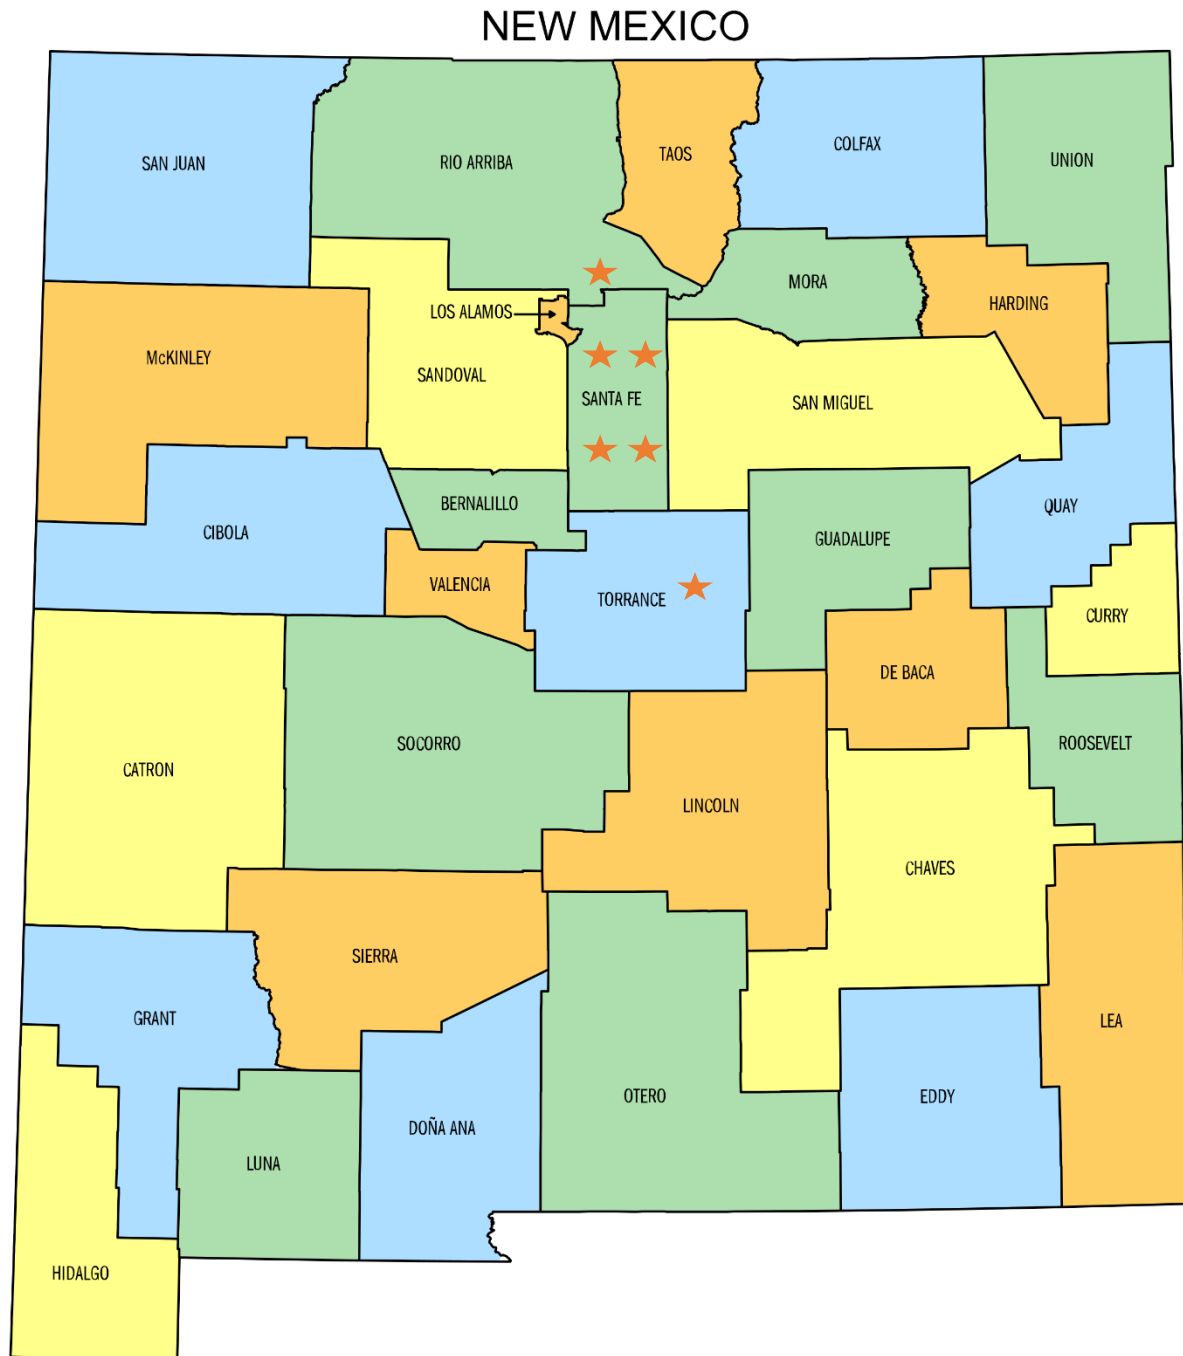

**Supplementary Figure 1: County level data for six novel *Yersinia pestis* isolates.** The genomes 0697, 0813, were isolated from Torrance, and Rio Arriba (Espanola). While genomes 2149, 7498, 7979, and 9706, were isolated from Santa Fe county. Image adapted from <https://suncatcherstudio.com>.
